# Supplementary material for: Genome-wide microRNA expression profiling in placentae from frozen-thawed blastocyst transfer
Source: PubMed Central journal article supplement (PMC5543431; doi:10.1186/s13148-017-0379-6), 2017-08-03

# Figure S1-1

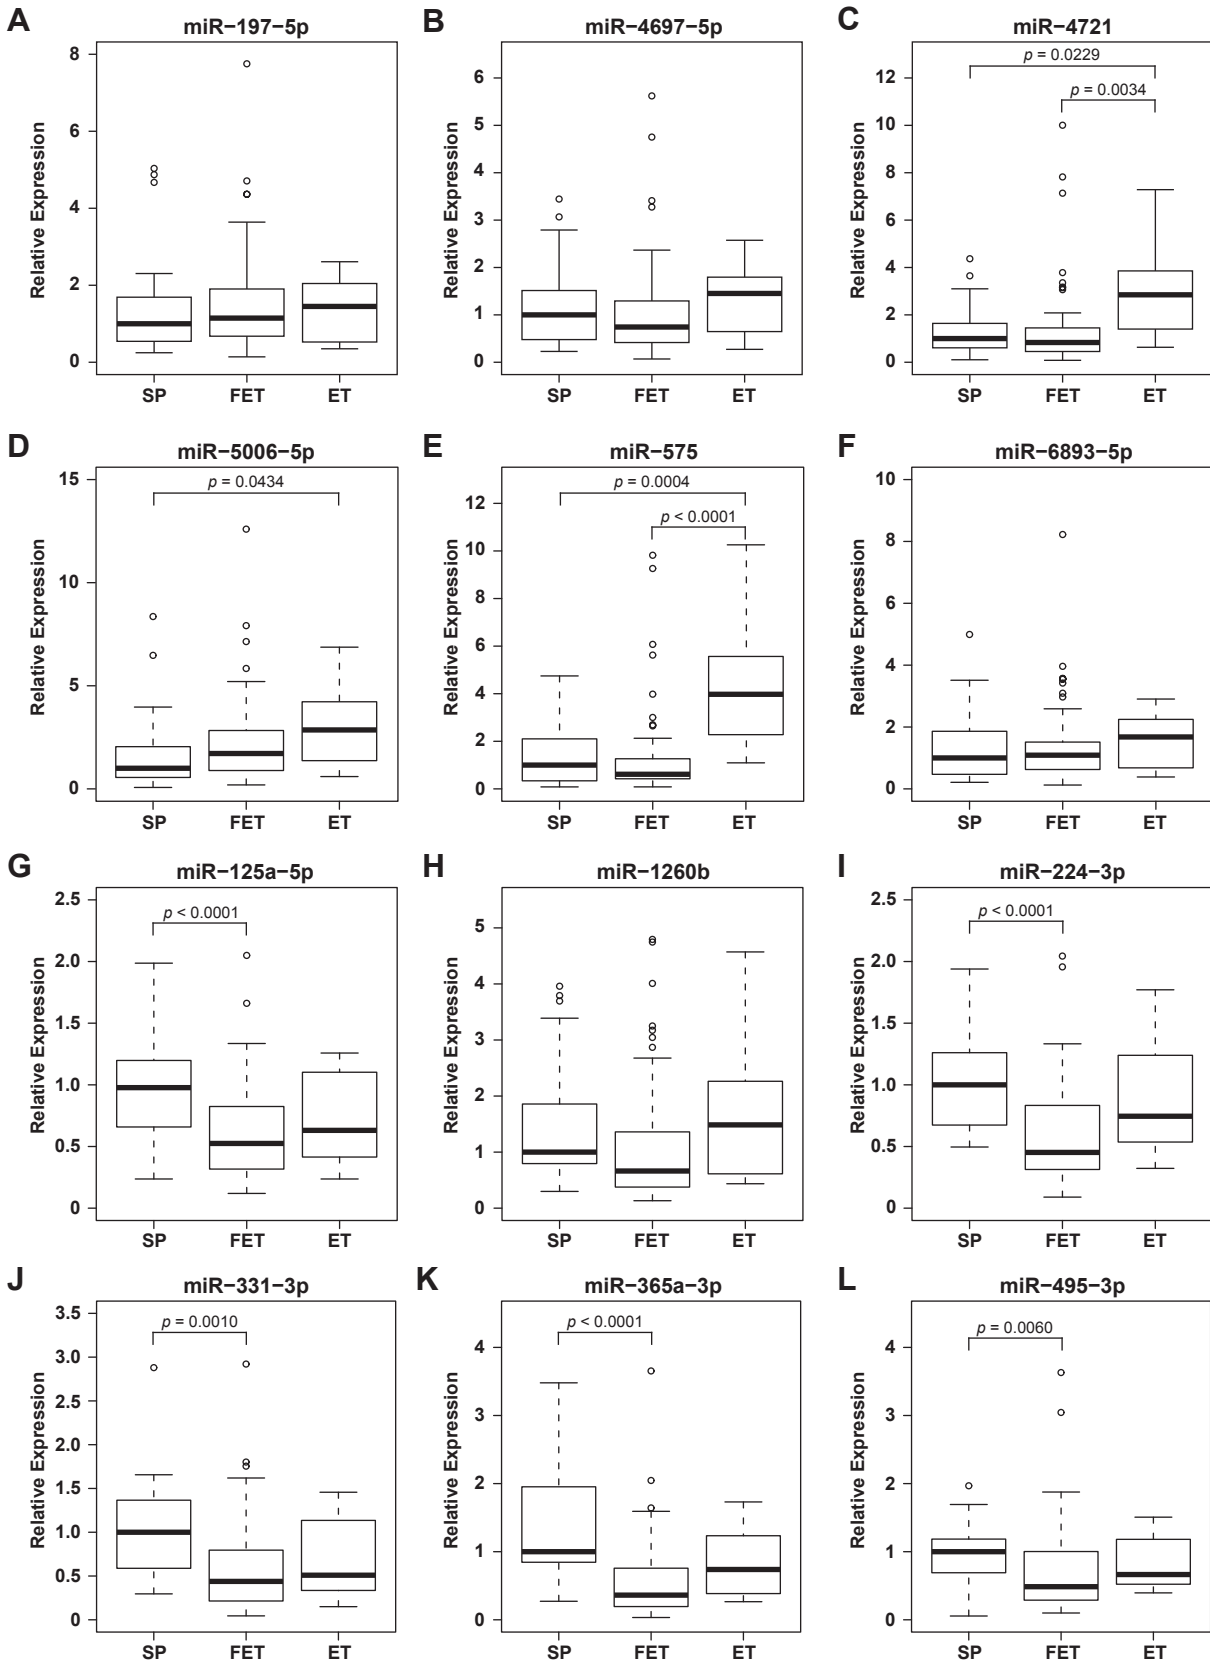

# Figure S1-2

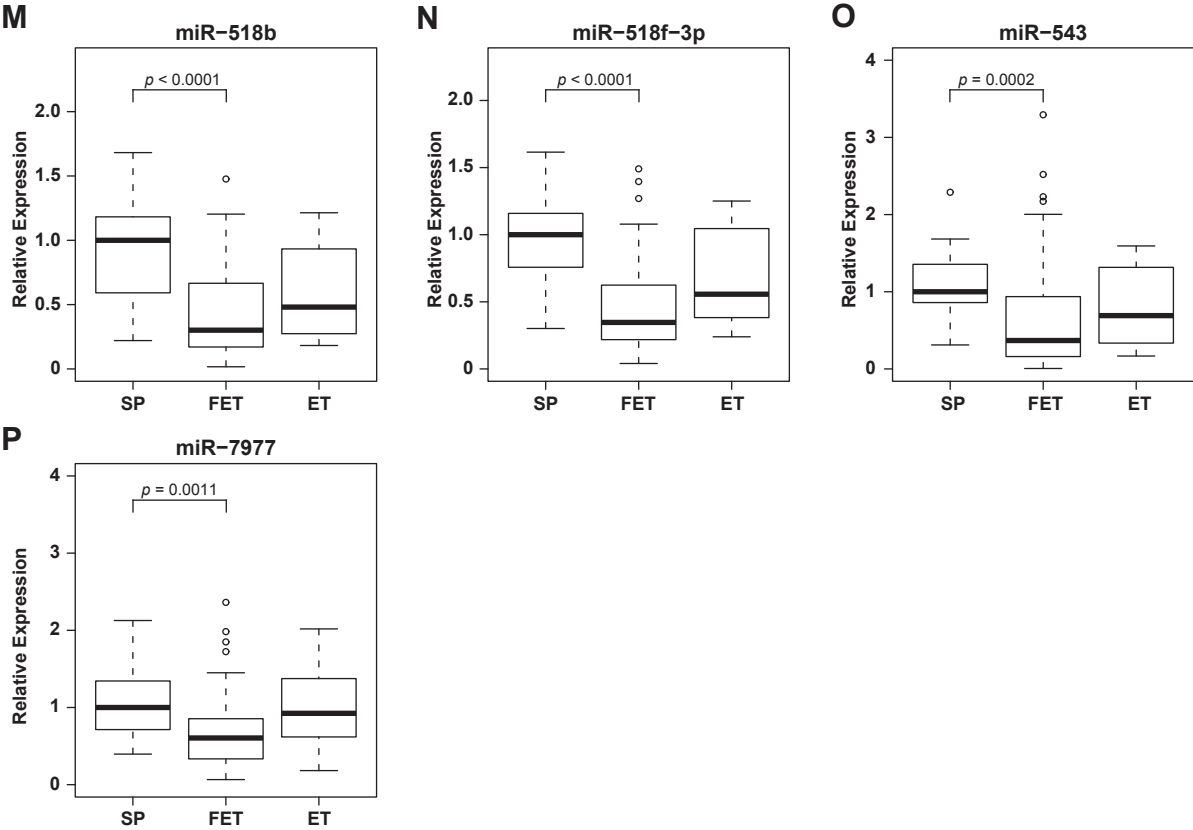

Supplement: 13148_2017_379_MOESM5_ESM.pdf [file 13148_2017_379_MOESM5_ESM.pdf]
